# Supplementary material for: A pectin/chitosan/zinc oxide nanocomposite for adsorption/photocatalytic remediation of carbamazepine in water samples
Source: Royal Society of Chemistry journal article supplement (doi:10.1039/d0ra08010a), 2020-01-01
Supplement: d0ra08010a1.pdf [file d0ra08010a1.pdf]

**"Pectin/Chitosan/Zinc Oxide nanocomposite for adsorption/photocatalytic  
remediation of carbamazepine in water samples"**

**Electronic Supporting Information (ESI)**

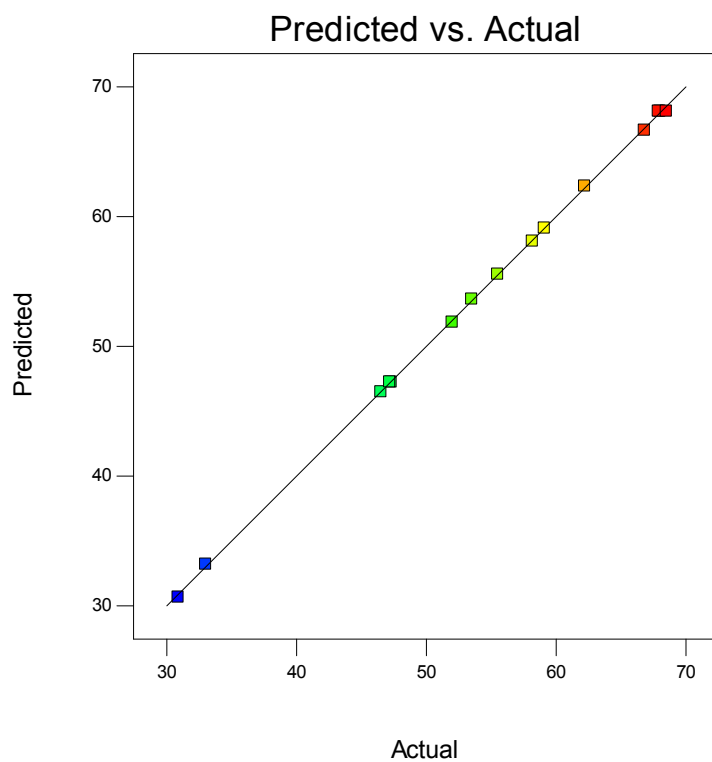

**Figure S1: Plot of predicted values versus actual values for CBZ degradation  
using Pec/CS/ZnO nanocomposite**

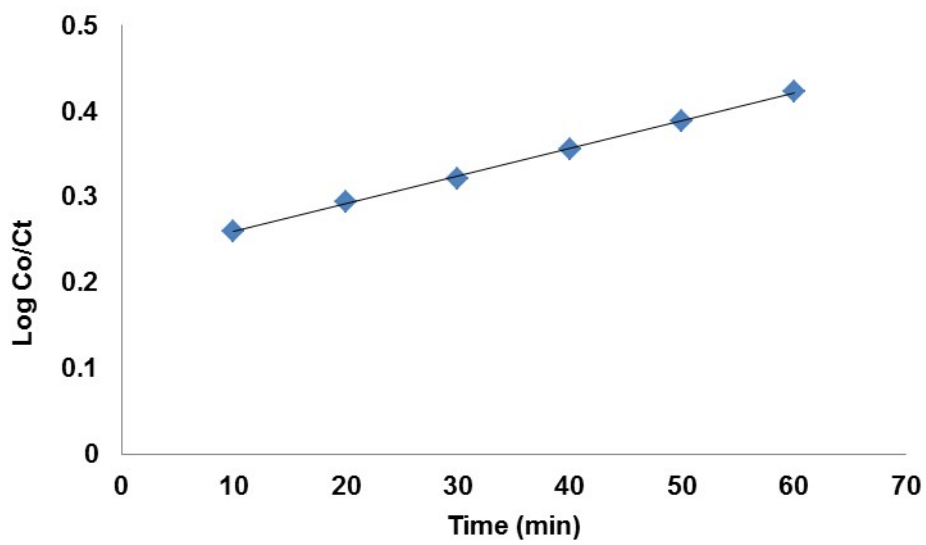

**Figure S2: Fitting of kinetics data to Pseudo first order equation, Pec/CS/ZnO amount: 0.5 g/L, CBZ conc.: 10 mg/L, temperature: 25 °C, pH: 4.0**
